# Supplementary material for: A Rapid and Easy-to-Perform Method of Nucleic-Acid Based Dengue Virus Diagnosis Using Fluorescence-Based Molecular Beacons
Source: MDPI journal article supplement (doi:10.3390/bios11120479), 2021-11-26
Supplement: s1 [file s1]

Supporting Information

# A Rapid and Easy-to-Perform Method of Nucleic-Acid Based Dengue Virus Diagnosis Using Fluorescence-Based Molecular Beacons

Soumi Sukla <sup>1,2</sup>, Prasenjit Mondal <sup>1,3,4</sup>, Subhajit Biswas <sup>1,4,\*</sup> and Surajit Ghosh <sup>1,4,5,\*</sup>

<sup>1</sup> CSIR-Indian Institute of Chemical Biology, 4, Raja S.C. Mullick Road, Kolkata 700032, West Bengal, India; soumi.sukla@niperkolkata.edu.in (S.S.); pmondal@mgh.harvard.edu (P.M.)

<sup>2</sup> National Institute of Pharmaceuticals Education and Research, 168, Maniktala Main Road, Kolkata 700054, West Bengal, India

<sup>3</sup> Department of Neurology, Massachusetts General Hospital, Harvard Medical School, Charlestown, MA 02129, USA

<sup>4</sup> Academy of Scientific and Innovative Research (AcSIR), Ghaziabad 201002, Uttar Pradesh, India

<sup>5</sup> Department of Bioscience & Bioengineering, Indian Institute of Technology Jodhpur, NH 62, Surapura Bypass Road, Karwar 342037, Rajasthan, India

\* Correspondence: subhajit.biswas@iicb.res.in (S.B.); sghosh@iitj.ac.in (S.G.)

**Citation:** Sukla, S.; Mondal, P.; Biswas, S.; Ghosh, S. A Rapid and Easy-to-Perform Method of Nucleic-Acid Based Dengue Virus Diagnosis Using Fluorescence-Based Molecular Beacons. *Biosensors* **2021**, *11*, 479.  
<https://doi.org/10.3390/bios11120479>

Received: 16 September 2021

Accepted: 19 November 2021

Published: 26 November 2021

**Publisher's Note:** MDPI stays neutral with regard to jurisdictional claims in published maps and institutional affiliations.

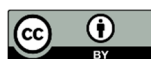

**Copyright:** © 2021 by the authors. Submitted for possible open access publication under the terms and conditions of the Creative Commons Attribution (CC BY) license (<https://creativecommons.org/licenses/by/4.0/>).

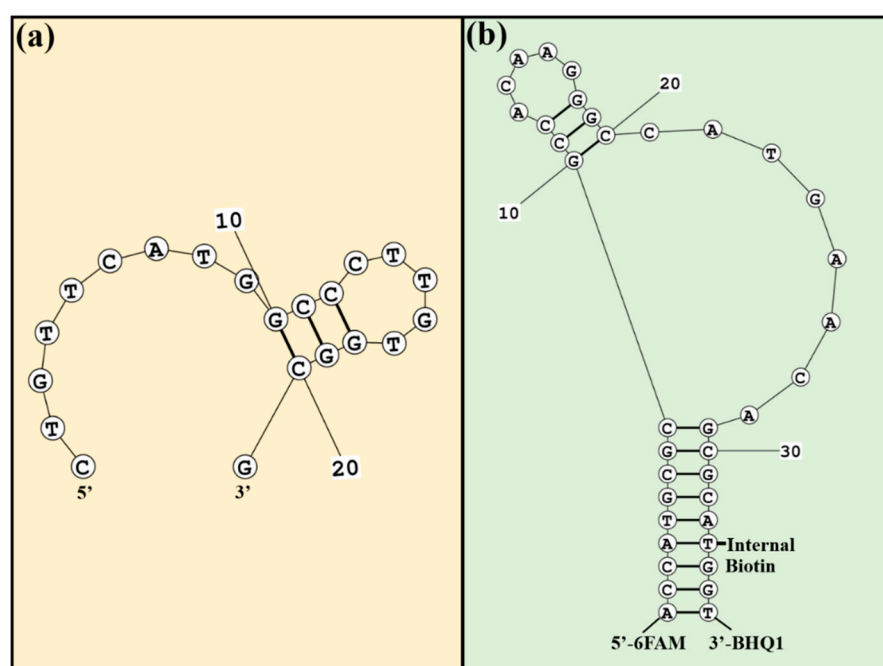

**Figure S1.** RNAstructure webserver-predicted structure of DENV2-specific target D2C (a) and the DENV2-specific target probe D2P (b) used for detection of D2C. This same D2C target was also used for checking cross-reactivity with the pan-DENV probe.

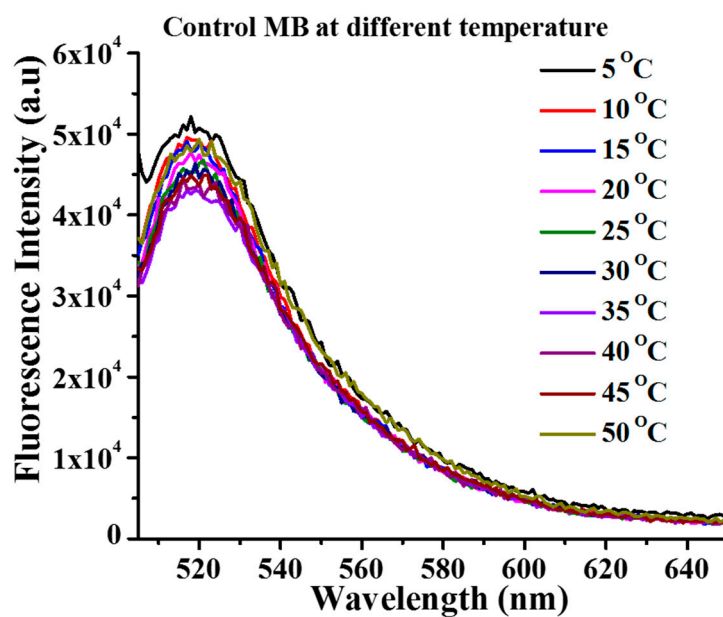

**Figure S2.** Molecular beacon (MB) standardization, fluorescence intensity of control molecular beacon with increasing temperatures.

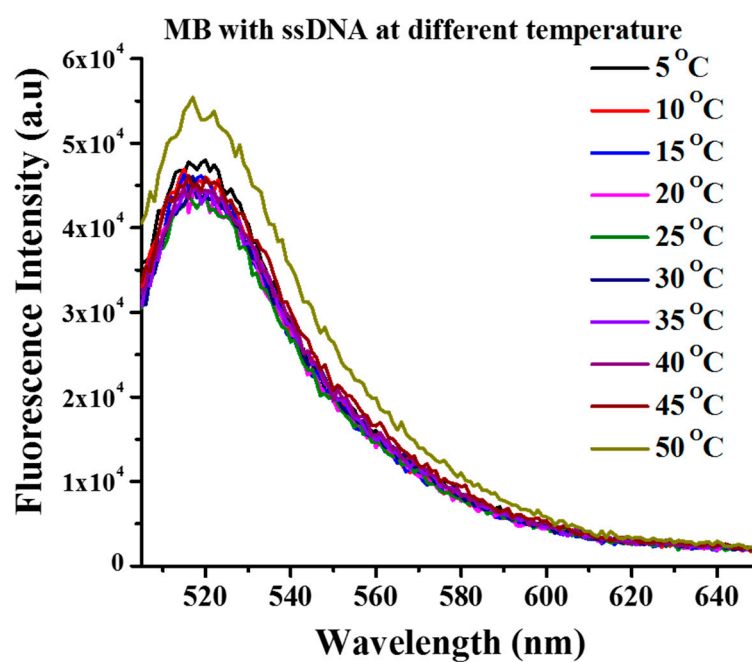

**Figure S3.** Molecular beacon (MB) standardization, fluorescence intensity of control molecular beacon with target ssDNA with increasing temperatures.

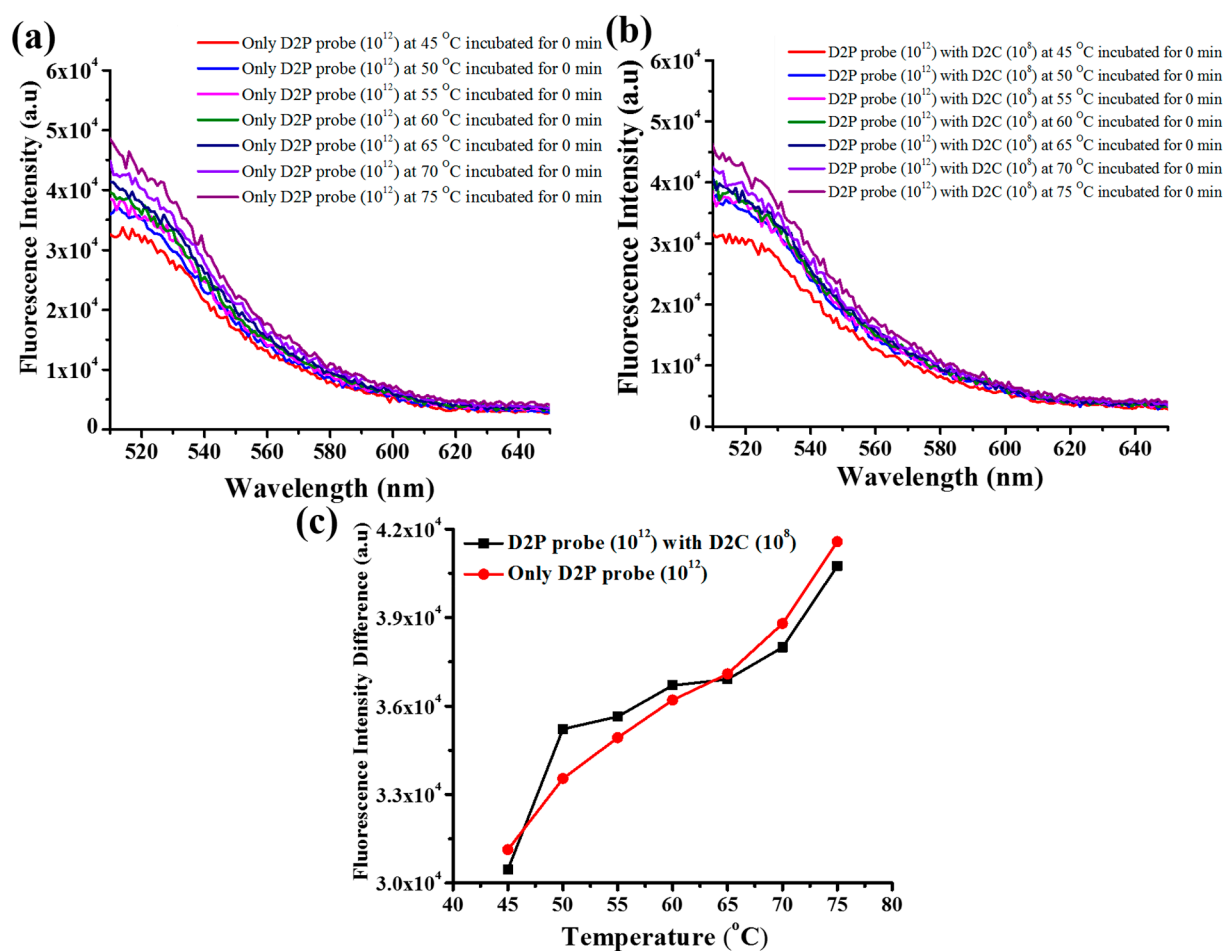

**Figure S4.** Fluorescence intensity measurement of only D2P probe (a), D2P probe with D2C target sequence (b) with increasing temperature from 45 °C to 75 °C. (c) Relative fluorescence increment upon adding D2C target sequence to D2P probe at different temperatures. Maximum fluorescence difference was observed at 50 °C.

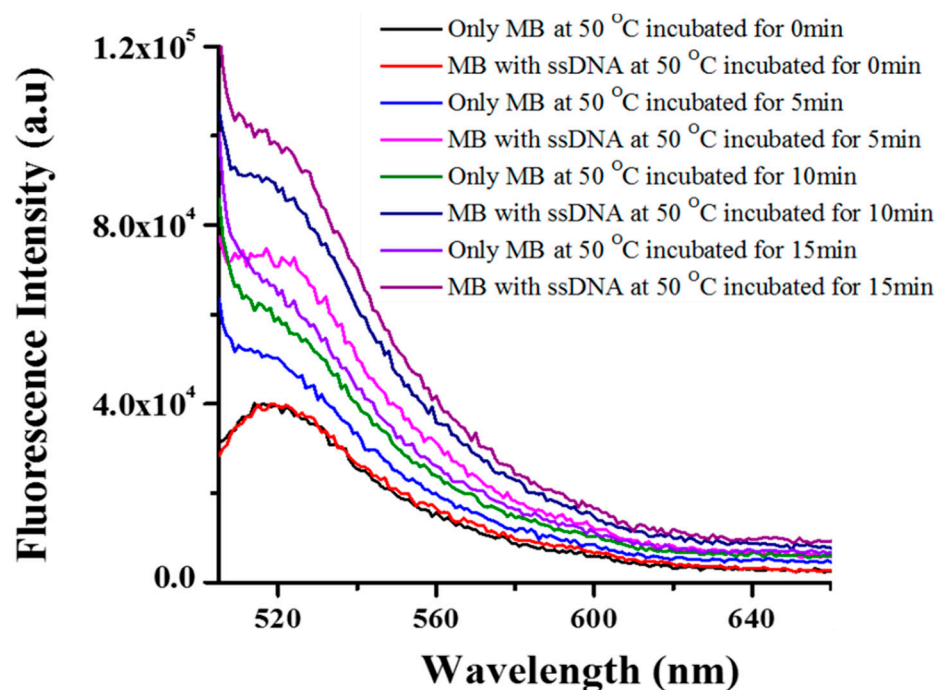

**Figure S5.** Fluorescence intensity measurement of MB and MB with ssDNA after incubating them for different time periods at 50 °C.

| Fluorometer Settings        | Values     |
|-----------------------------|------------|
| Excitation Slit width       | 1.25 mm    |
| Emission Slit Width         | 1.25 mm    |
| Voltage                     | 121v       |
| Integration time            | 0.1sec     |
| Excitation Wavelength       | 495 nm     |
| Measured Emission range     | 505-650 nm |
| Maximum Emission wavelength | 519 nm     |

**Figure S6.** Fluorometer parameters used to measure the fluorescence intensity of different probes.

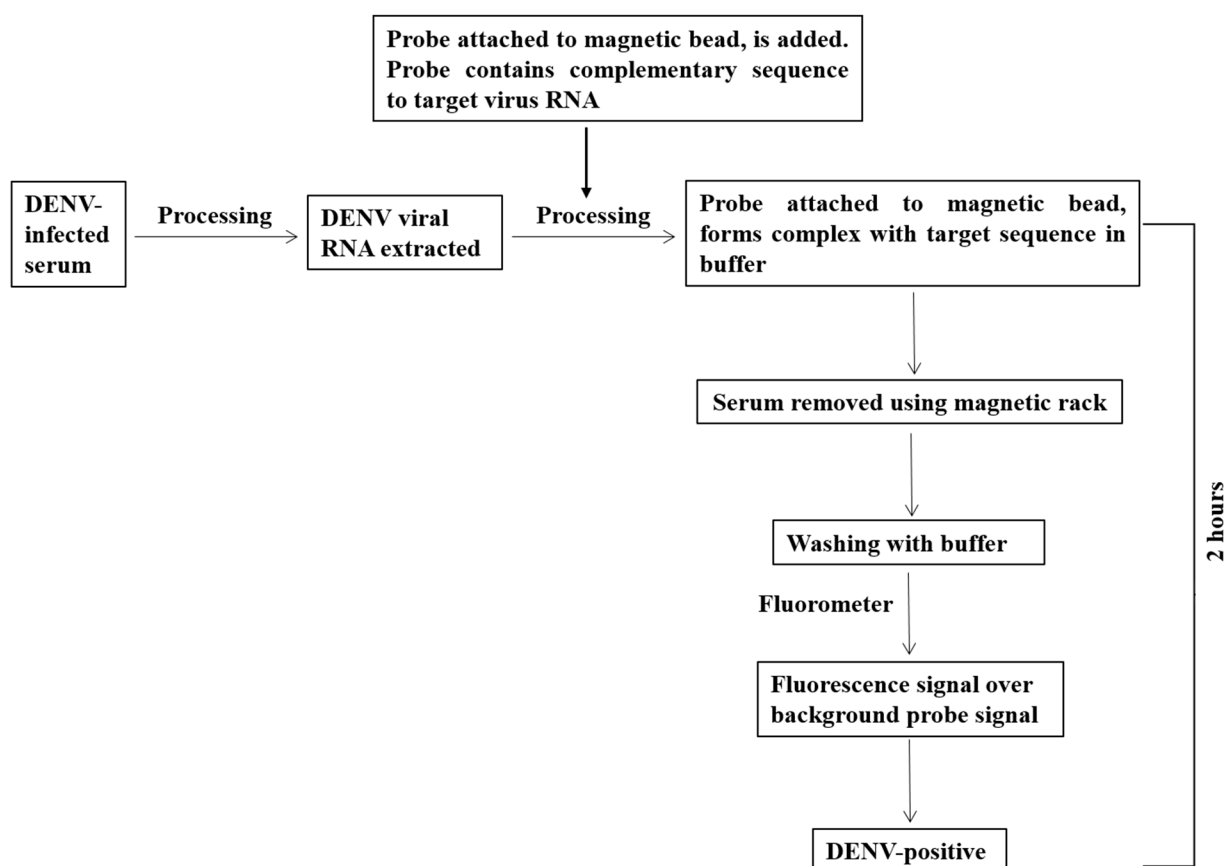

**Figure S7.** Schematic view of the overall process of the present invention.

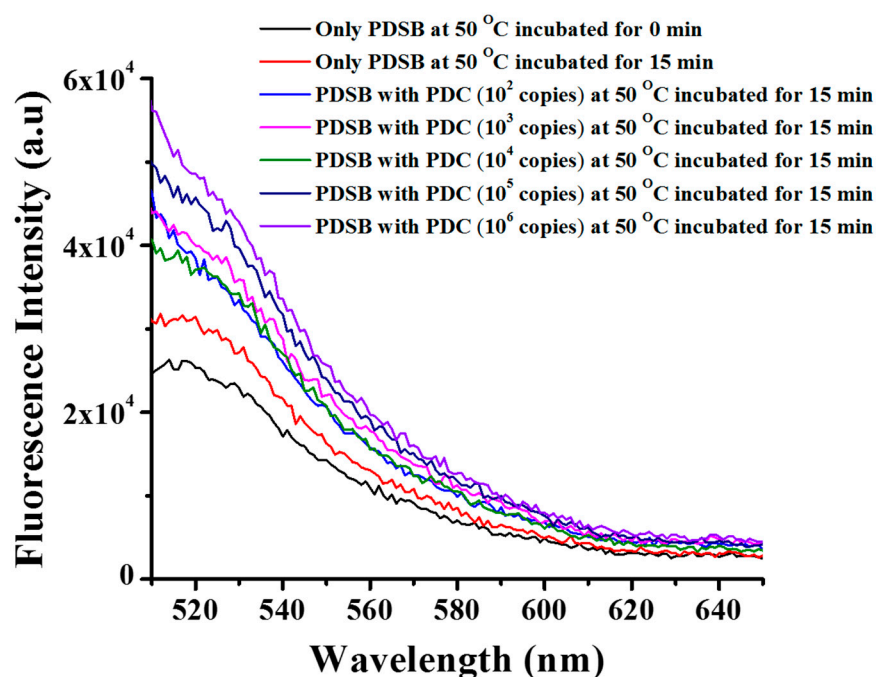

**Figure S8.** Fluorescence intensity measurement of PDSB probe only and PDSB probe with different concentrations of PDC target at 50°C for 15 min to check the sensitivity of PDSB probe.

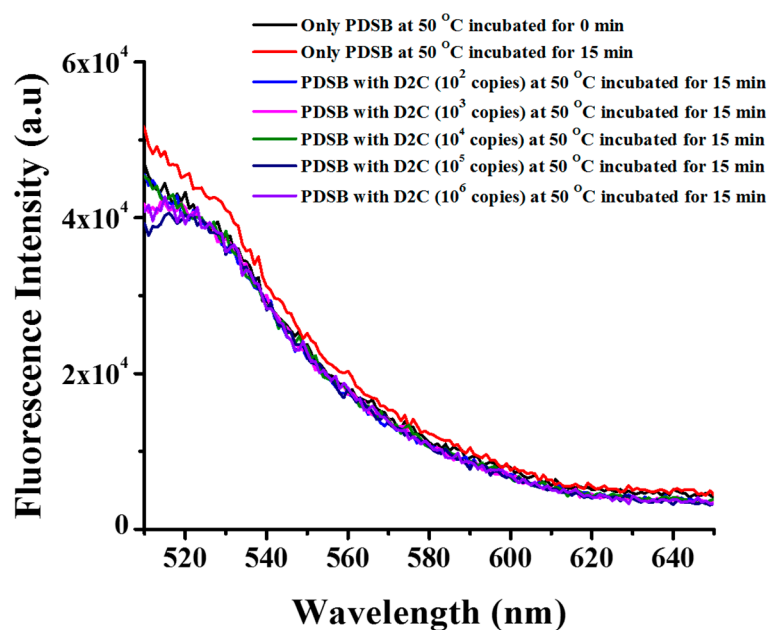

**Figure S9.** Fluorescence intensity measurement of PDSB probe only and with different concentrations of non-specific target (D2C) to check the specificity of PDSB probe at 50 °C for 15 min.

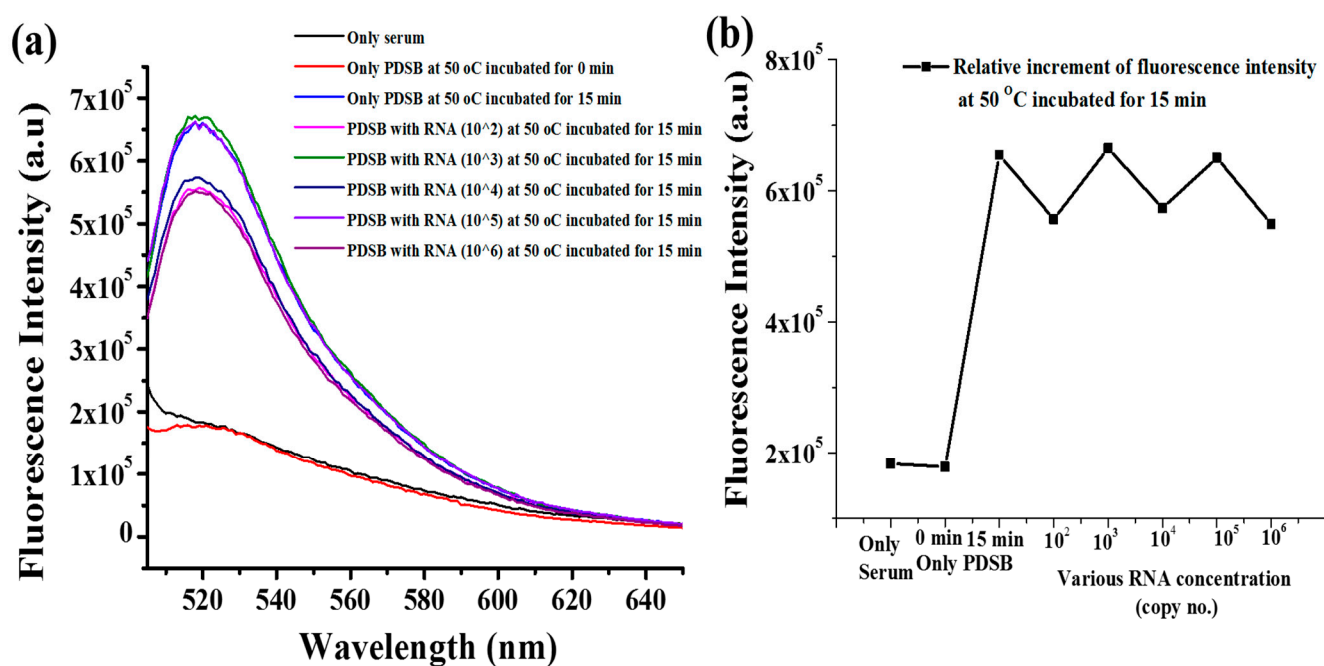

Figure S10. Fluorescence intensity measurement (a) and relative fluorescence increment (b) of PDSB probe ( $10^{13}$ ) with various concentrations of DENV1 RNA at 50 °C temperature.

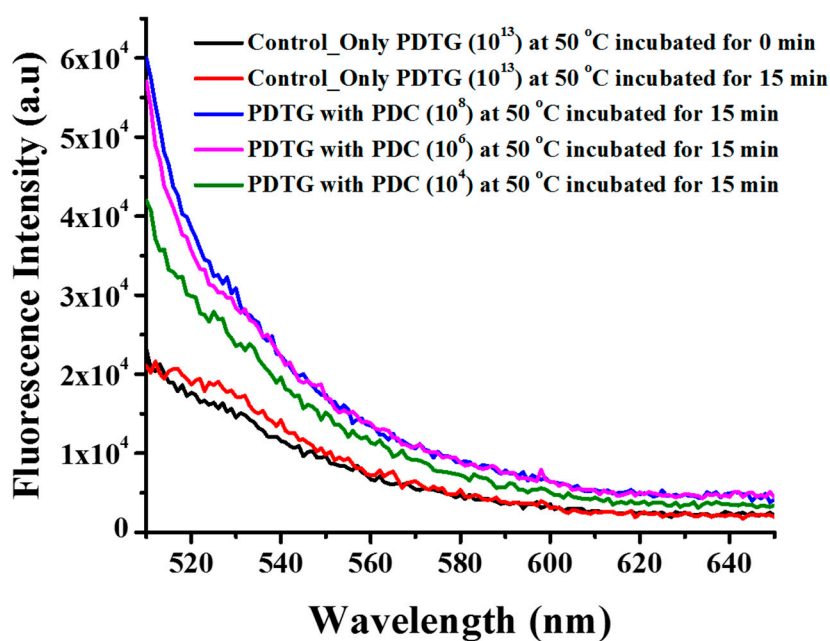

Figure S11. Fluorescence intensity measurement of only biotin tagged pan-dengue probe (PDTG) and PDTG with different copy numbers of target (PDC) at 50 °C.

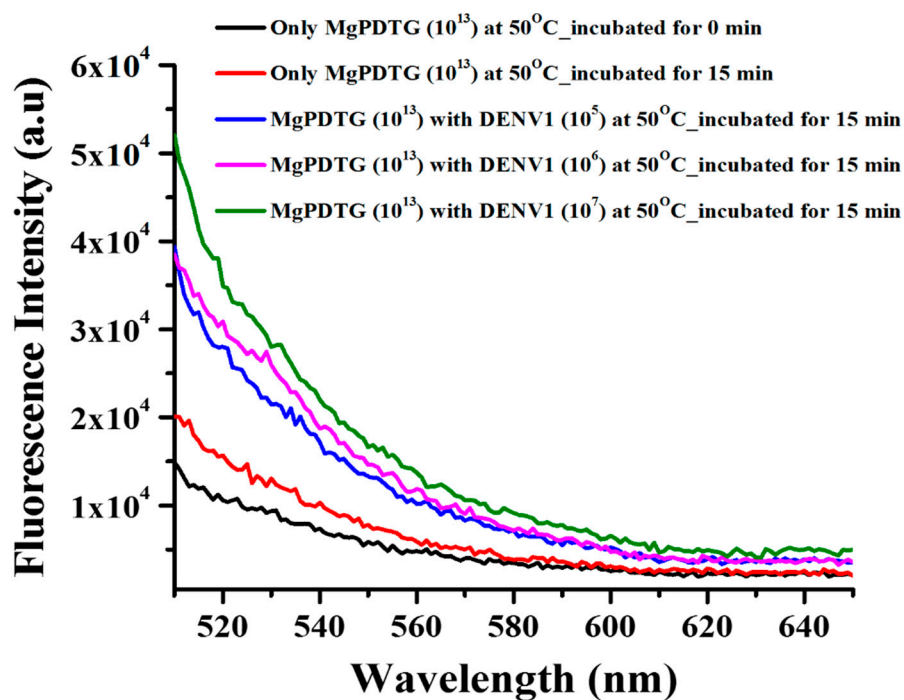

Figure S12. Fluorescence intensity measurement of biotinylated pan-dengue probe immobilized on Strep-MagBeads (Mg-PDTG) only and in presence of DENV1 target sequence at  $50^\circ\text{C}$ .

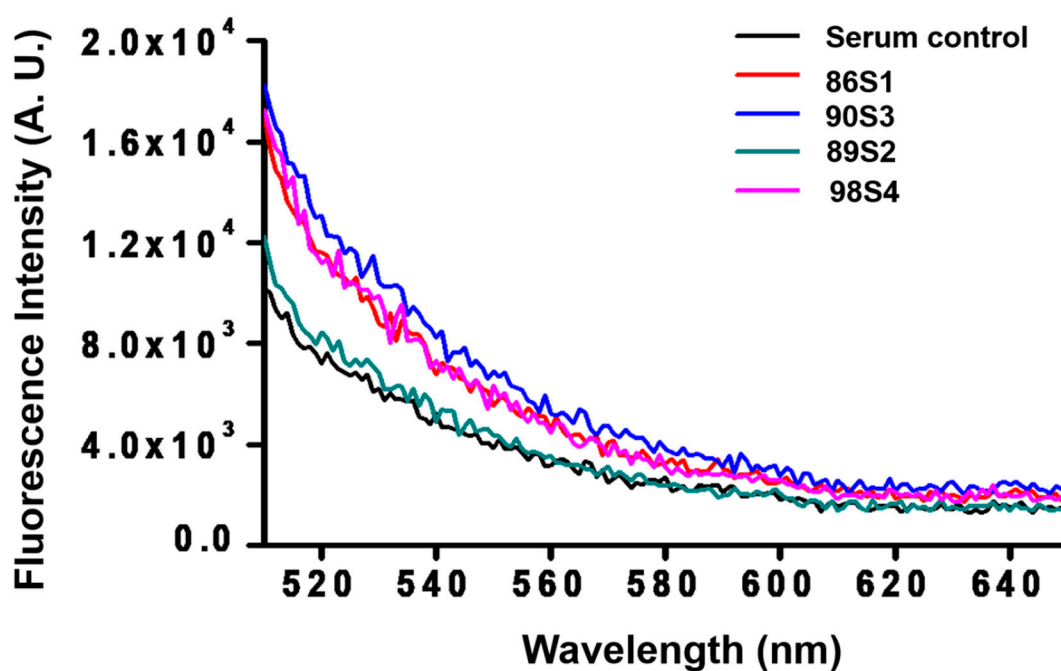

Figure S13. Detection of clinical DENV samples. Fluorescence intensity of various clinical samples measured with Mg-PDTG probe at  $50^\circ\text{C}$ .



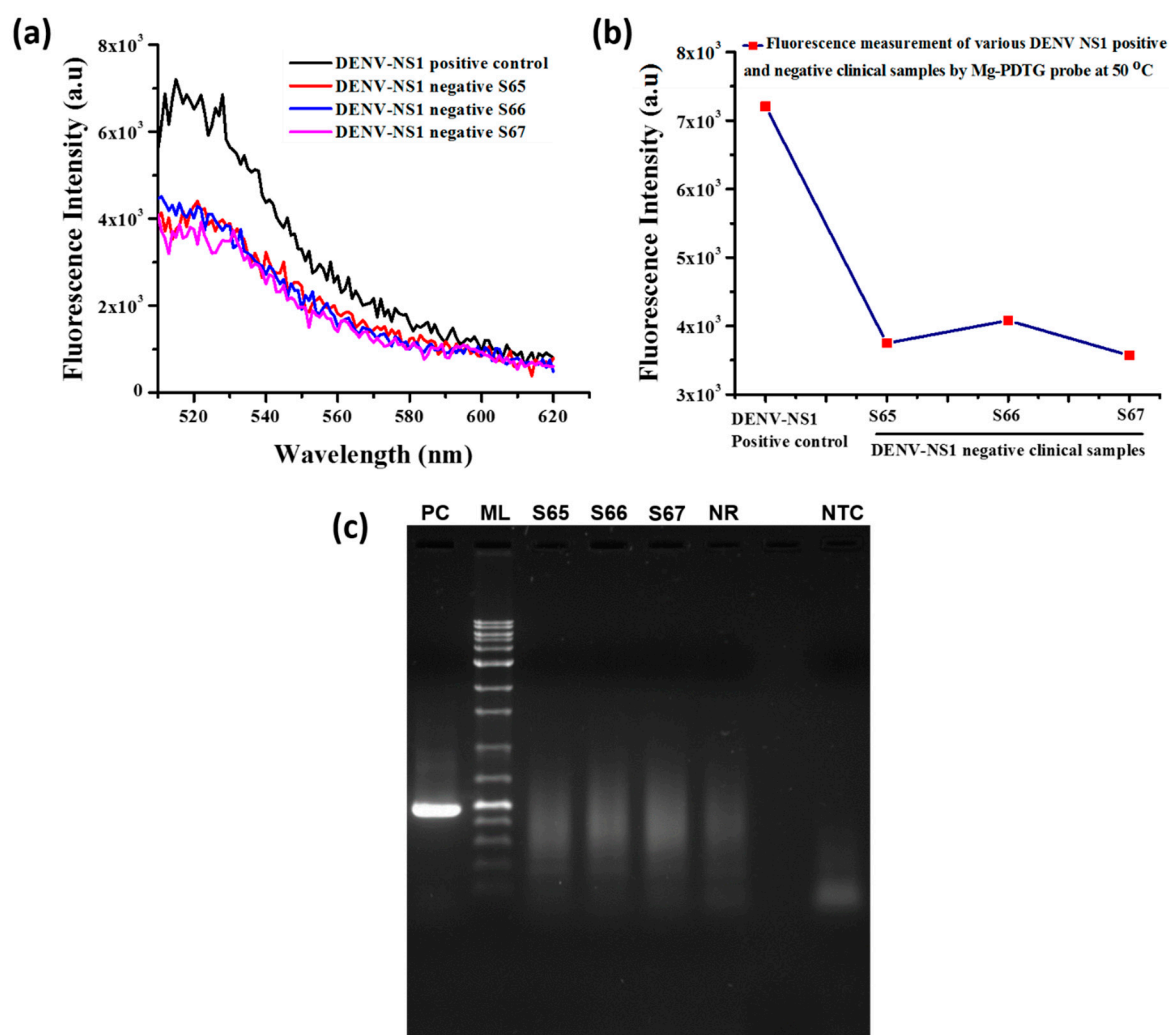

**Figure S14. Detection of DENV-negative clinical samples.** (a) Fluorescence intensity of a DENV NS1-positive control (PC) with three DENV NS1-negative control clinical samples (S65, S66, and S67) measured with the Mg-PDTG probe at 50 °C. (b) Quantification graph showing the relative difference in fluorescence intensity between the DENV NS1-positive and DENV NS1-negative clinical samples measured with the Mg-PDTG probe at 50 °C. (c) Agarose gel (1%) electrophoresis image of the DENV qRT-PCR products, obtained from RNA isolated from the DENV-NS1 positive and negative clinical samples. [PC: DENV NS1-positive control; ML: Molecular weight ladder, same as shown in Figure 3b; NTC: no-template control; NR: not relevant to this study].

|                    | NS1-ELISA method                                                                                                                                                   | qRT-PCR Method                                                                  | Molecular-beacon based detection                                                                                  |
|--------------------|--------------------------------------------------------------------------------------------------------------------------------------------------------------------|---------------------------------------------------------------------------------|-------------------------------------------------------------------------------------------------------------------|
| Detection method   | Antigen                                                                                                                                                            | cDNA<br>(Nucleic acid test)                                                     | RNA<br>(Nucleic acid test)                                                                                        |
| <b>Serotyping</b>  | No                                                                                                                                                                 | Possible                                                                        | Possible                                                                                                          |
| <b>Sensitivity</b> | Less sensitive than the other two. Sensitivity had been reported to range from 52-86% based on different studies using different commercially available kits [1-7] | Highest sensitivity. Can detect even less than 10 copies of viral genome [8-11] | Can detect up to 10 <sup>2</sup> copies but linearity was only perceptible from 10 <sup>4</sup> copies and higher |
| <b>Viral load</b>  | Not quantitative                                                                                                                                                   | Quantitative                                                                    | Semi-quantitative                                                                                                 |
| <b>Ease-of-use</b> | Easy to use                                                                                                                                                        | Requires trained manpower                                                       | Easy to use                                                                                                       |
| <b>Time</b>        | 2-3 hrs                                                                                                                                                            | 6-8 hrs                                                                         | 2 hrs                                                                                                             |

**Table S1.** Comparison between NS1-ELISA, qRT-PCR and molecular-beacon-based dengue diagnosis.

## References:

- (1) Solanke, V. N.; Karmarkar, M. G.; Mehta, P. R. Early dengue diagnosis: Role of rapid NS1 antigen, NS1 early ELISA and PCR assay. *Trop J Med Res* 2015, 18, 95–9.
- (2) Ambrose, J. H.; Sekaran, S. D.; Azizan, A. (2017). Dengue virus NS1 protein as a diagnostic marker: commercially available ELISA and comparison to qRT-PCR and serological diagnostic assays currently used by the State of Florida. *Journal of Tropical Medicine*, 2017, 8072491. doi:10.1155/2017/8072491
- (3) Hermann, L. L.; Thaisomboonsuk, B.; Poolpanichupatam, Y.; Jarman, R. G.; Kalayanarooj, S et al. Evaluation of a dengue NS1 antigen detection assay sensitivity and specificity for the diagnosis of acute dengue virus infection. *PLoS Negl Trop Dis*. 2014, 8, e3193.
- (4) Hunsperger, E. A.; Yoksan, S.; Buchy, P.; Nguyen, V. C.; Sekaran, S. D et al. Evaluation of commercially available diagnostic tests for the detection of dengue virus NS1 antigen and anti-dengue virus IgM antibody. *PLoS Negl Trop Dis*. 2014, 8, 3171
- (5) Aryati, A.; Trimarsanto, H.; Yohan, B.; Wardhani, P.; Fahri, S et al. Performance of commercial dengue NS1 ELISA and molecular analysis of NS1 gene of dengue viruses obtained during surveillance in Indonesia. *BMC Infect Dis*. 2013, 13, 611.
- (6) Lima, Mda. R. Q.; Nogueira, R. M. R.; Schatzmayr, H. G.; dos Santos, F. B.; Comparison of three commercially available dengue NS1 antigen capture assays for acute diagnosis of dengue in Brazil. *PLoS Negl Trop Dis*. 2010, 4, e738.
- (7) Guzman, M. G.; Jaenisch, T.; Gaczkowski, R.; Ty Hang, V. T.; Sekaran, S. D. et al. Multi-country evaluation of the sensitivity and specificity of two commercially-available NS1 ELISA assays for dengue diagnosis. *PLoS Negl Trop Dis*. 2010, 4, e811.
- (8) Parkash, O.; Shueb, R. H. Diagnosis of Dengue Infection Using Conventional and Biosensor Based Techniques. *Viruses*. 2015, 7, 5410–5427.
- (9) Muller DA, Depelsenair AC, Young PR. Clinical and Laboratory Diagnosis of Dengue Virus Infection. *J Infect Dis*. 2017; 215, S89–S95.
- (10) Lanciotti, R. S.; Calisher, C. H.; Gubler, D. J.; Chang, G. J.; Vorndam, A. V.; Rapid detection and typing of dengue viruses from clinical samples by using reverse transcriptase-polymerase chain reaction. *J Clin Microbiol*. 1992, 30, 545–551.
- (11) Waggoner, J. J.; Abeynayake, J.; Sahoo, M. K.; Gresh, L.; Tellez, Y et al. Single-reaction, multiplex, real-time RT-PCR for the detection, quantitation, and serotyping of dengue viruses. *PLoS Negl Trop Dis*. 2013; 7, e2116.
